# Supplementary material for: An Essential Requirement for the SCAP/SREBP Signaling Axis to Protect Cancer Cells from Lipotoxicity
Source: Oxford University Press journal article supplement (doi:10.1158/0008-5472.can-13-0382-t), 2013-02-26
Supplement: 00085472can130382t-sup-table_1_pdf_92k.pdf [file 00085472can130382t-sup-table_1_pdf_92k.pdf]

## GSEA (shSCAP U87 cells)

| <u>Rank</u> | <u>Pathway</u>                                  | <u>NES</u> | <u>Norm. FDR</u> |               |
|-------------|-------------------------------------------------|------------|------------------|---------------|
|             |                                                 |            | <u>p-val.</u>    | <u>q-val.</u> |
| 1           | Biosynthesis of steroids                        | -3.69      | >.001            | >.001         |
| 2           | Fatty Acid metabolism                           | -2.6       | >.001            | 0.002         |
| 3           | Glycerophospholipid metabolism                  | -1.94      | 0.013            | 0.103         |
| 4           | Terpenoid biosynthesis                          | -1.93      | 0.006            | 0.086         |
| 5           | Pyruvate metabolism                             | -1.92      | 0.018            | 0.072         |
| 6           | Metabolism of xenobiotics by<br>cytochrome P450 | -1.9       | 0.004            | 0.067         |
| 7           | Alpha-linolenic acid metabolism                 | -1.82      | 0.01             | 0.095         |
| 8           | Benzoate degradation via CoA<br>ligation        | -1.74      | 0.028            | 0.128         |
| 9           | Polyunsaturated fatty acid<br>biosynthesis      | -1.7       | 0.026            | 0.144         |
| 10          | Citrate cycle (TCA cycle)                       | -1.68      | 0.038            | 0.144         |
