# Supplementary figures and images for: An Essential Requirement for the SCAP/SREBP Signaling Axis to Protect Cancer Cells from Lipotoxicity
Source: Oxford University Press journal article supplement (doi:10.1158/0008-5472.can-13-0382-t), 2013-02-26

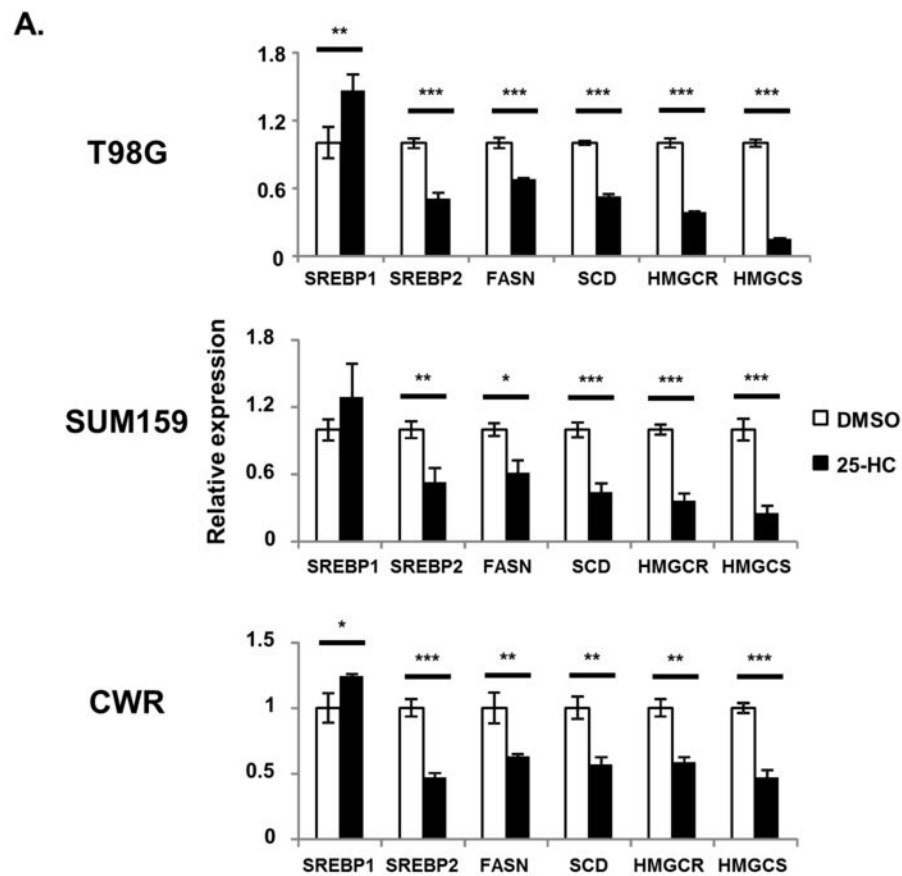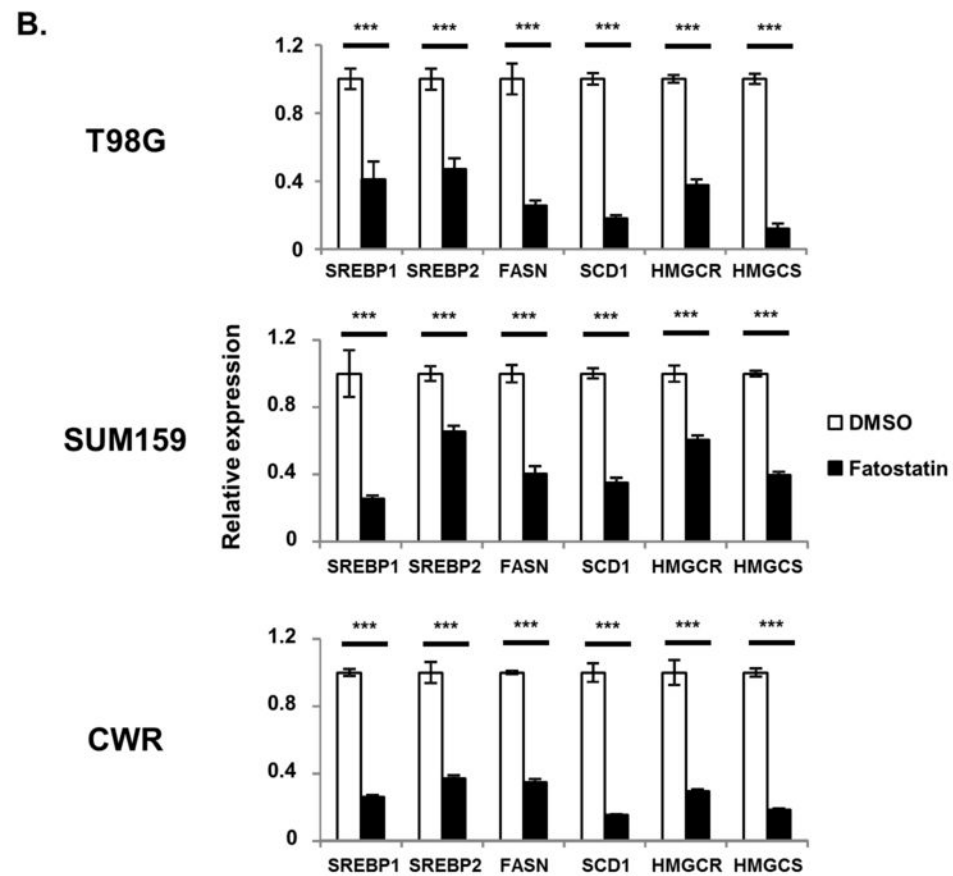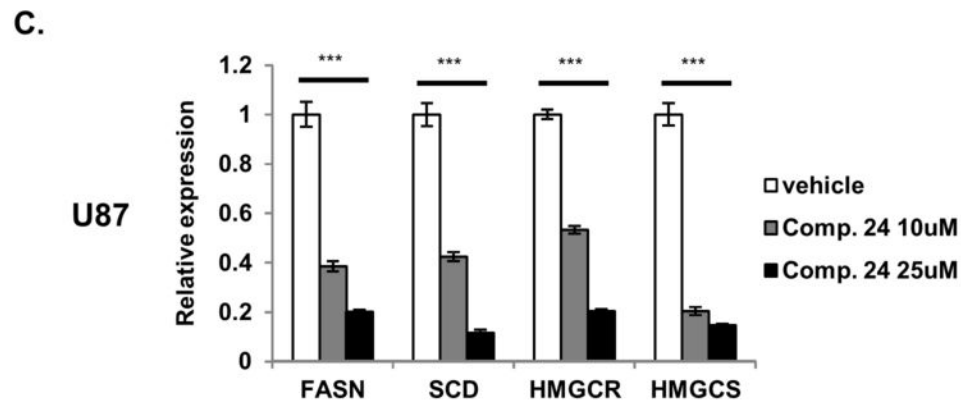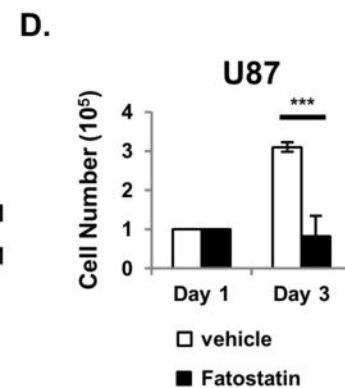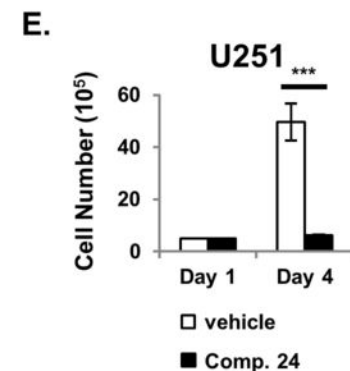

Supplement: 00085472can130382t-sup-fig_1_pdf_158k.pdf [file 00085472can130382t-sup-fig_1_pdf_158k.pdf]

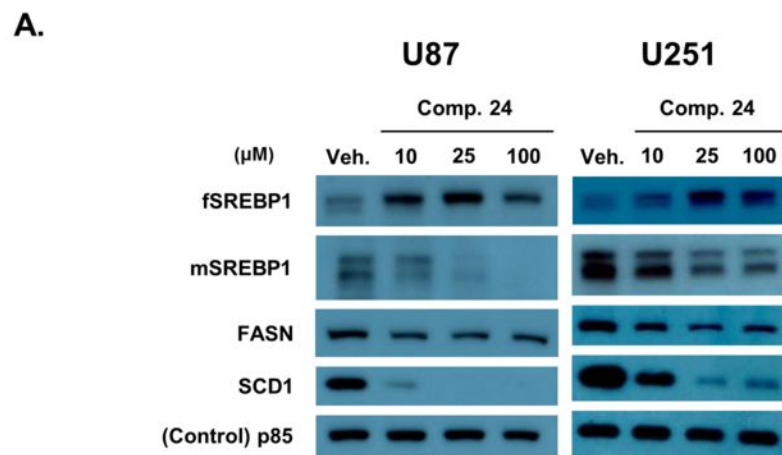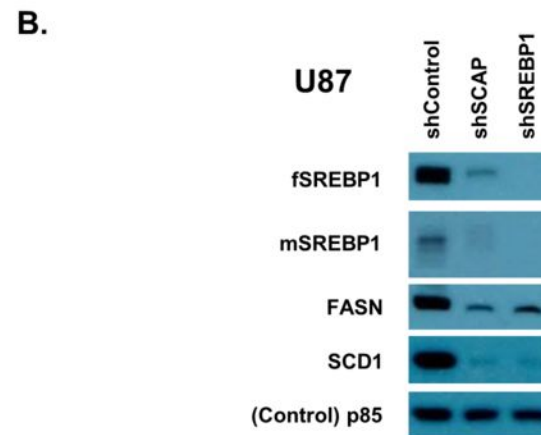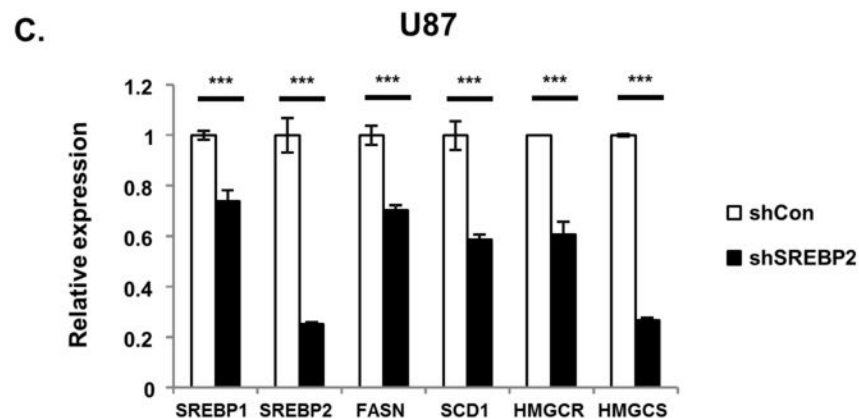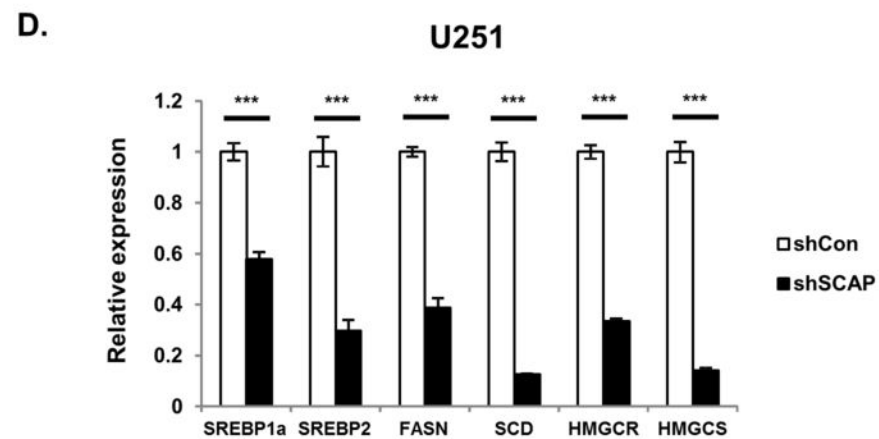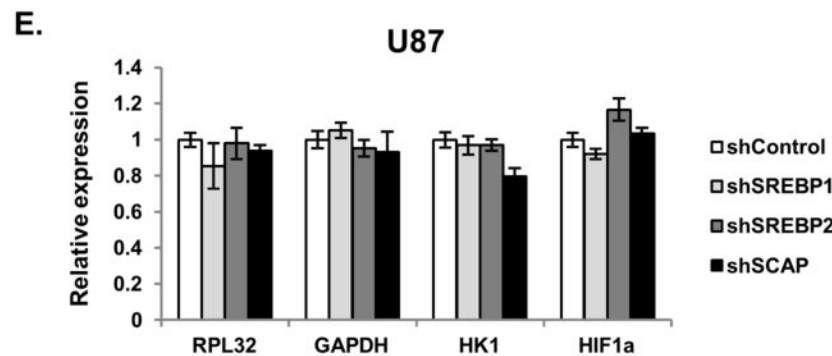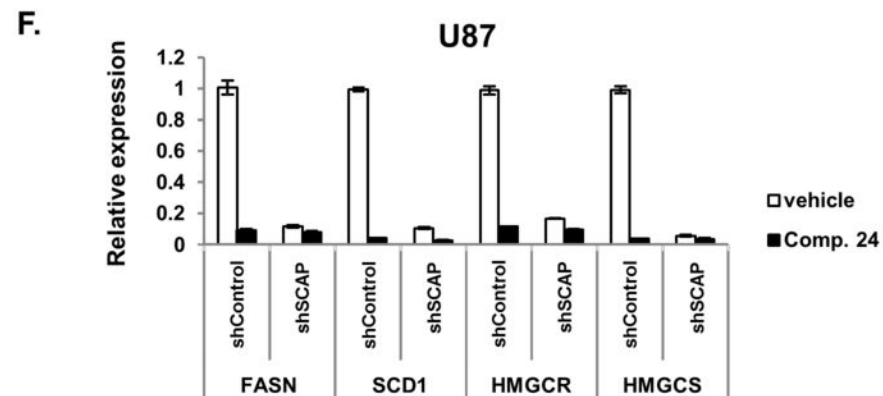

Supplement: 00085472can130382t-sup-fig_2_pdf_155k.pdf [file 00085472can130382t-sup-fig_2_pdf_155k.pdf]

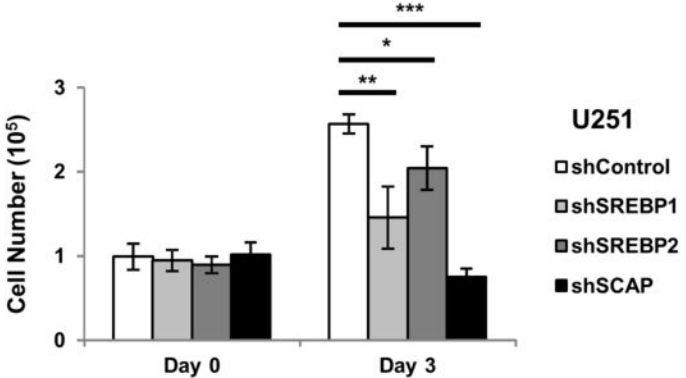

Supplement: 00085472can130382t-sup-fig_3_pdf_52k.pdf [file 00085472can130382t-sup-fig_3_pdf_52k.pdf]

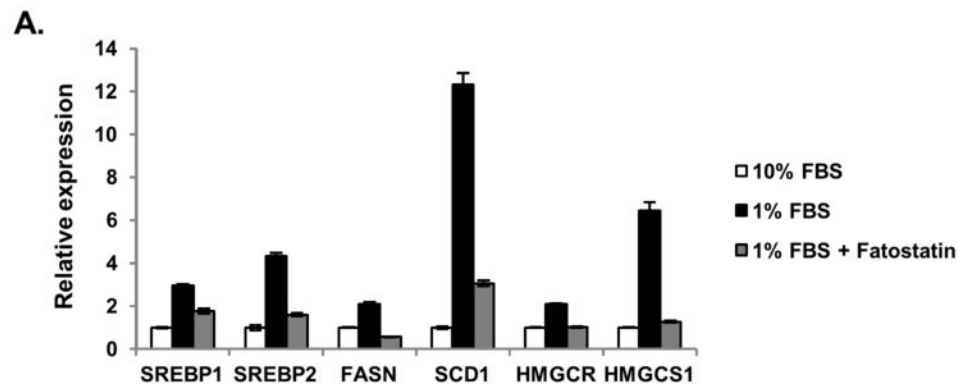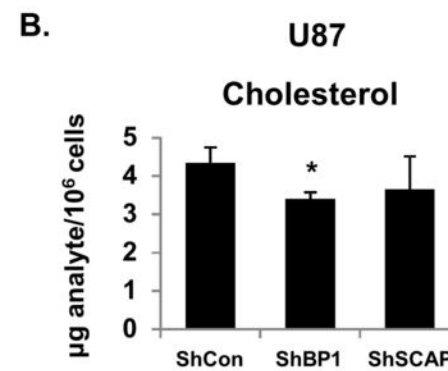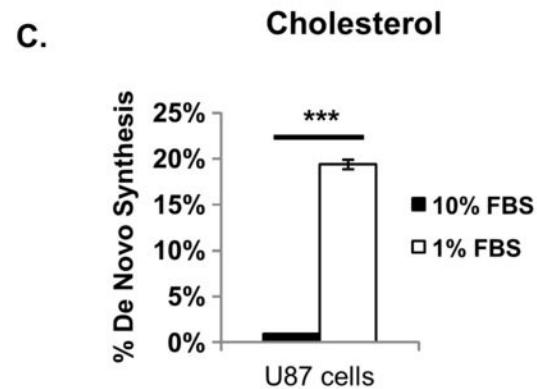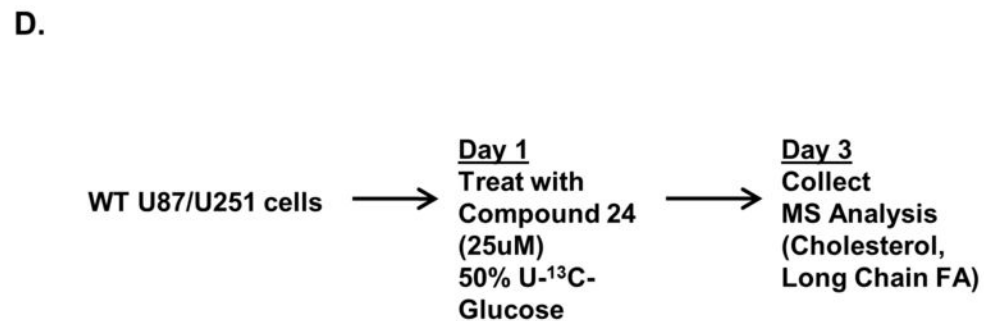

Supplement: 00085472can130382t-sup-fig_4_pdf_92k.pdf [file 00085472can130382t-sup-fig_4_pdf_92k.pdf]

A.

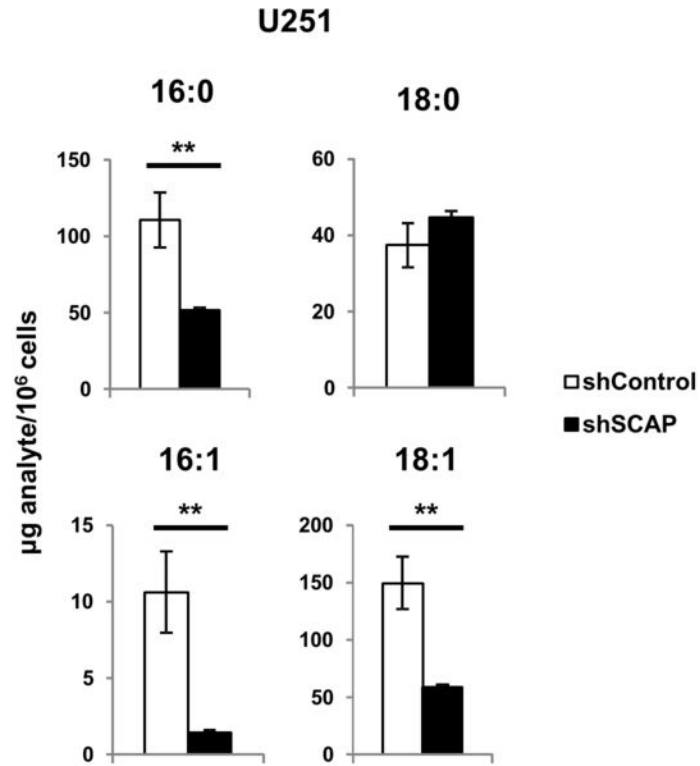

B.

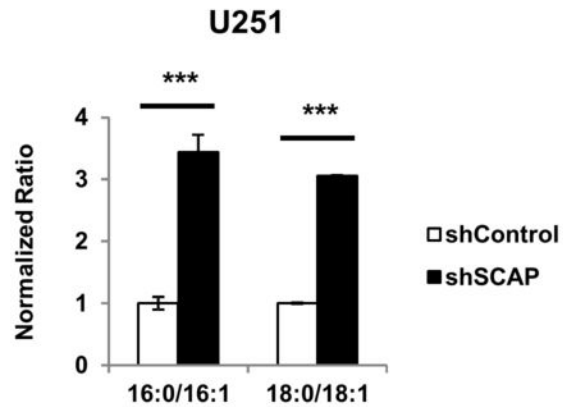

C.

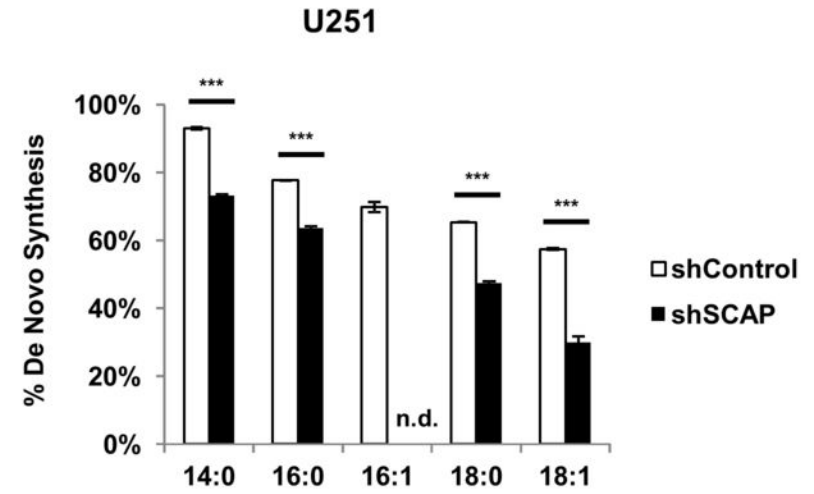

Supplement: 00085472can130382t-sup-fig_5_pdf_90k.pdf [file 00085472can130382t-sup-fig_5_pdf_90k.pdf]

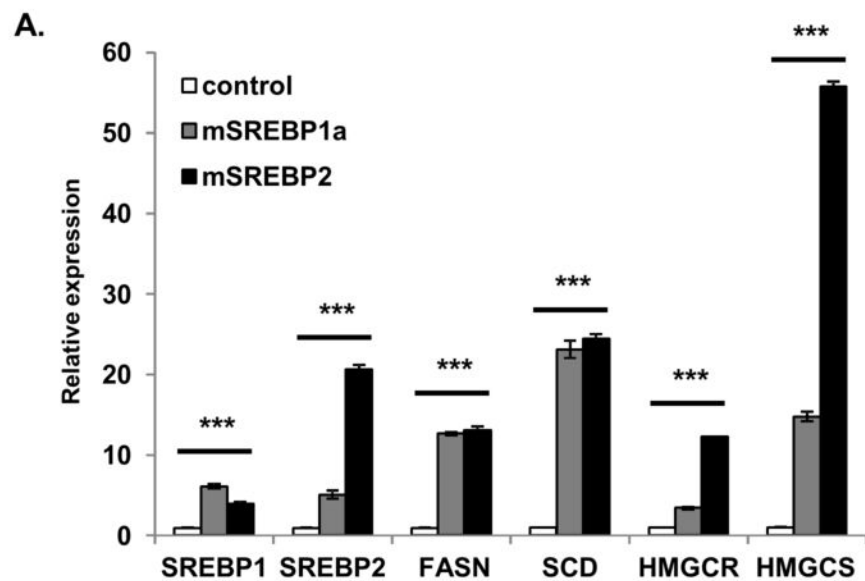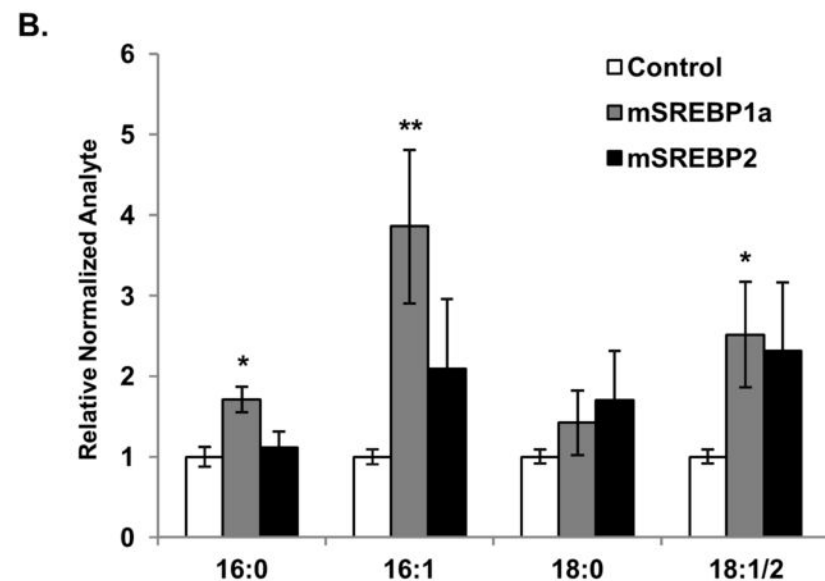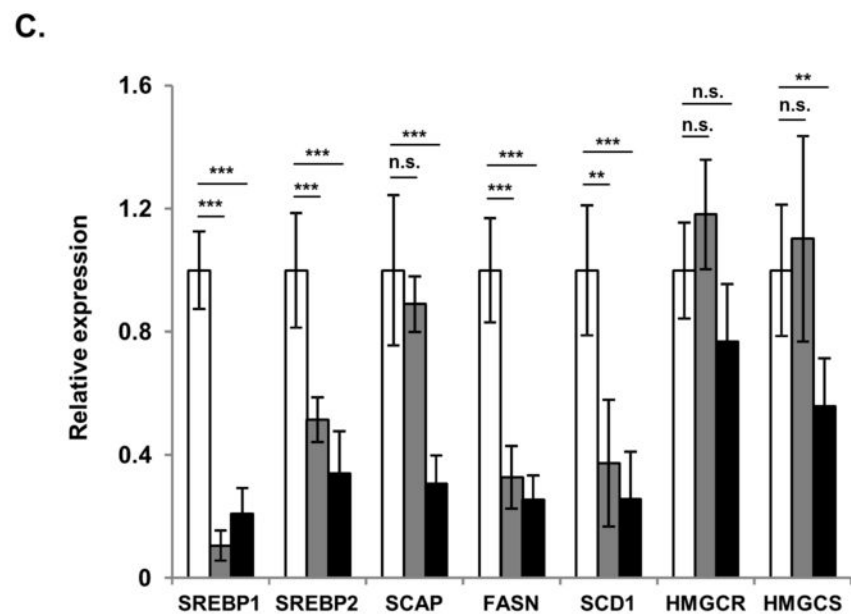

Supplement: 00085472can130382t-sup-fig_6_pdf_112k.pdf [file 00085472can130382t-sup-fig_6_pdf_112k.pdf]

A.

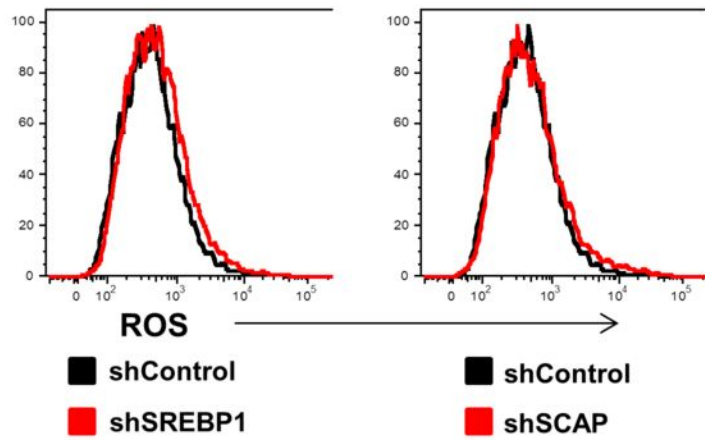

B.

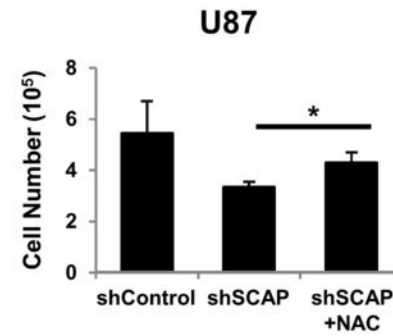

C.

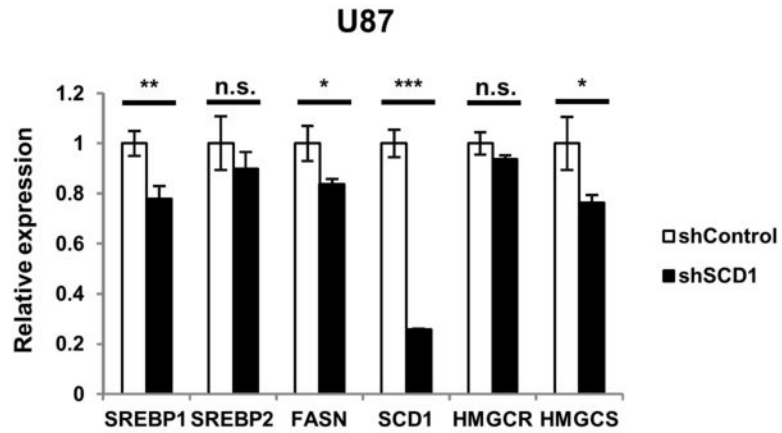

D.

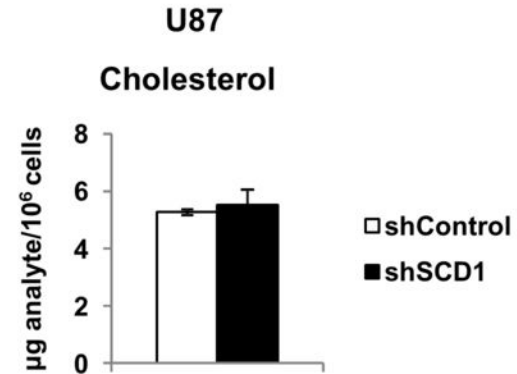

Supplement: 00085472can130382t-sup-fig_7_pdf_106k.pdf [file 00085472can130382t-sup-fig_7_pdf_106k.pdf]

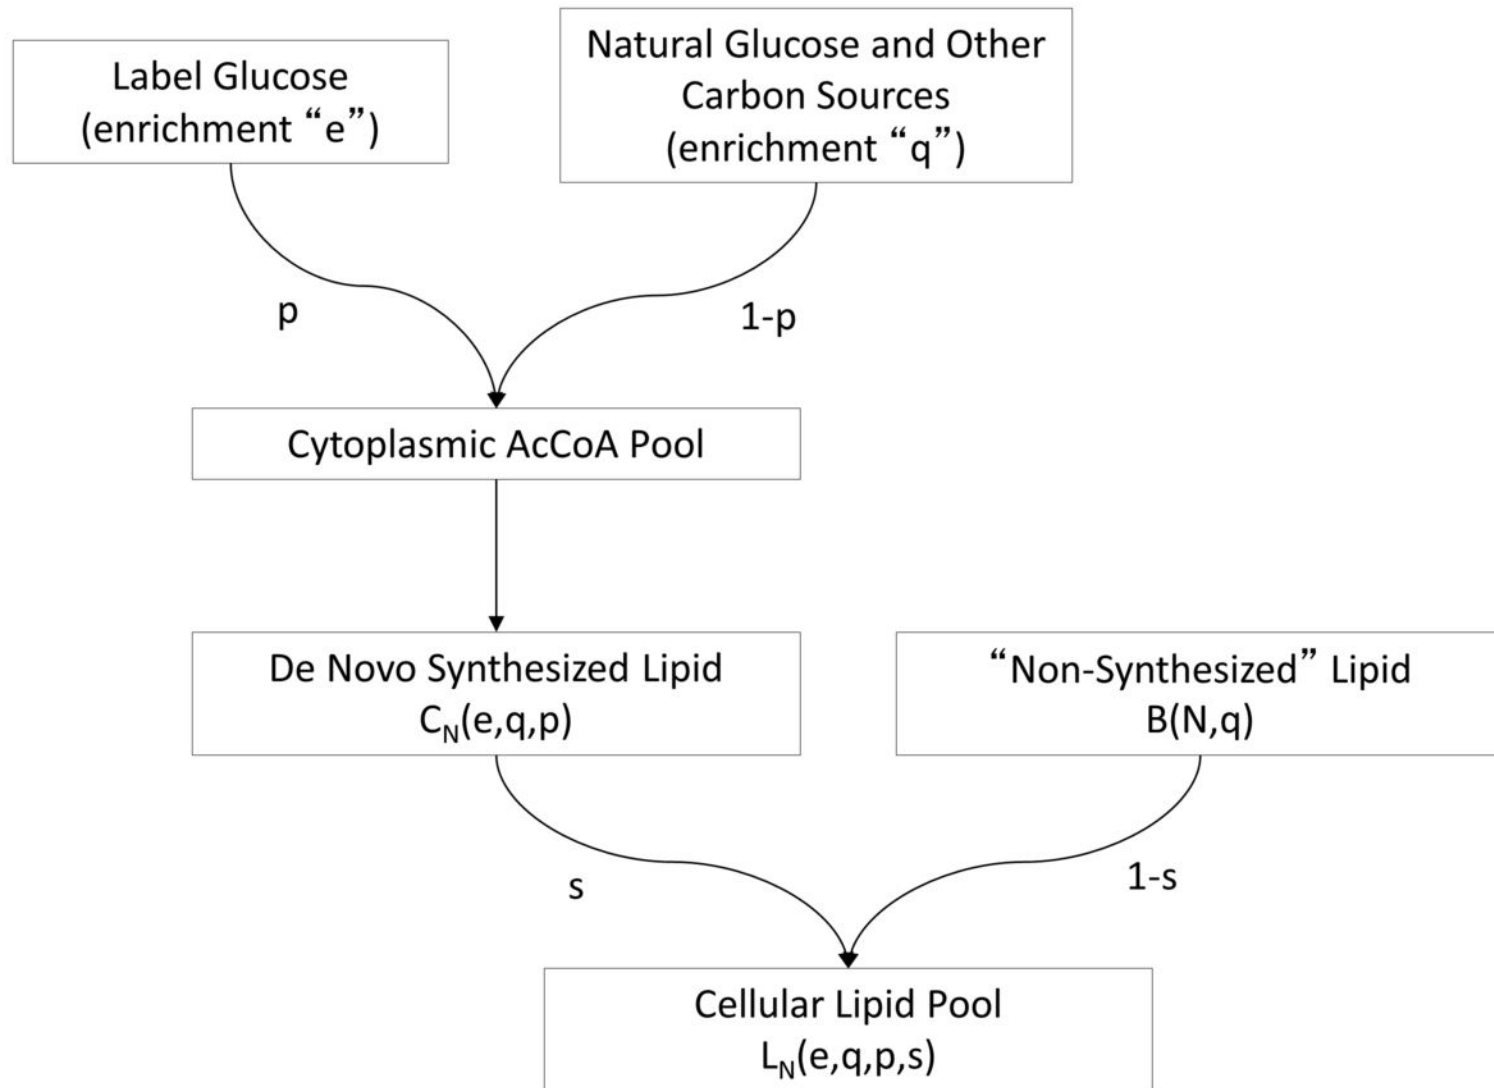

Supplement: 00085472can130382t-sup-fig_8_pdf_90k.pdf [file 00085472can130382t-sup-fig_8_pdf_90k.pdf]
